# Supplementary material for: Protective effects of melatonin against nicotine-induced disorder of mouse early folliculogenesis
Source: publisher site journal article supplement (doi:10.18632/aging.101405), 2018-03-28
Supplement: Supplementary file [file aging-v10i3-101405-supplementary-material-SD1.pdf]

SUPPLEMENTARY MATERIAL

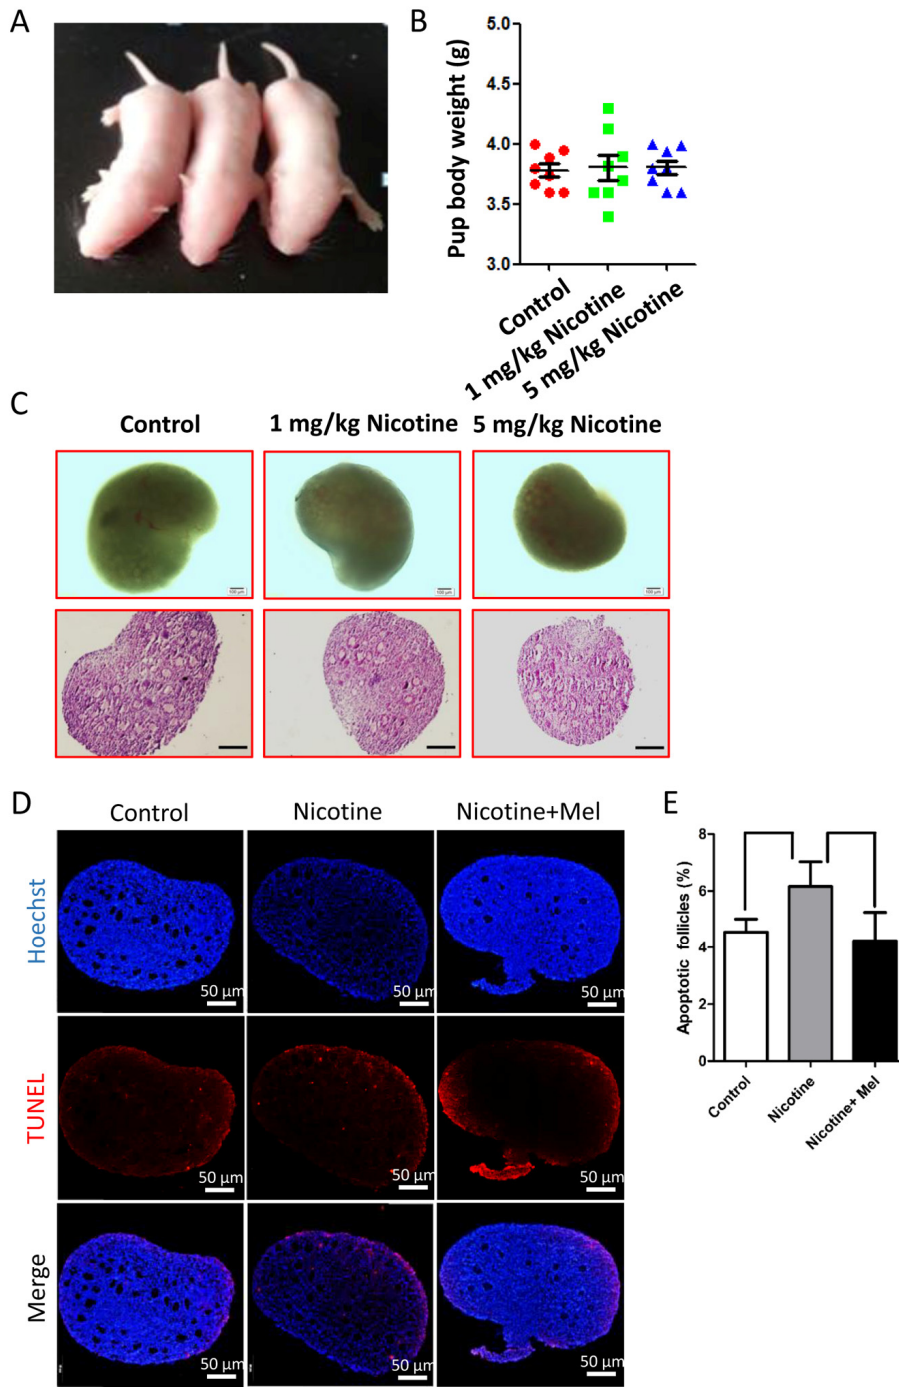

**Figure S1. Nicotine-exposed pups compared with normal littermate after deal with 5 days.** (A) Photograph of nicotine-exposed pups compared with normal littermate. (B) Body weight of nicotine-exposed and control pups. (C) Gross morphologies and representative H&E histological sections of the ovaries dissected from 4 dpp pups of the nicotine-exposed groups. (D) TUNEL histochemistry (red) in representative tissue sections of ovaries from normal, intraperitoneally injected 1 mg /kg nicotine and intraperitoneally injected 1 mg /kg nicotine plus 1µM melatonin pups. (E) The percentage of follicles with two or more TUNEL-positive cells in intraperitoneally injected 1 mg /kg nicotine and intraperitoneally injected 1 mg /kg nicotine plus 1 µM melatonin pups compared with normal pups. For each group, five ovaries were collected and follicles (n = 900) for statistical results, The results are presented as mean±SD. All the experiments were repeated at least three times. \* P < 0.05; \*\* P < 0.01.

**Table S1. Primers used for quantitative RT-PCR.**

| <b>Genes</b>    | <b>Genbanks</b> | <b>Forward primer sequences</b> | <b>Reverse primer sequences</b> | <b>Product Length (bp)</b> |
|-----------------|-----------------|---------------------------------|---------------------------------|----------------------------|
| <i>β-actin</i>  | NM_007393.5     | TCGTGGGCCGCCCTAGGCAC            | TGGCCTTAGGGTTCAGGGGGG           | 243                        |
| <i>Figla</i>    | NM_012013.1     | ACAGAGCAGGAAGCCCAGTA            | TGGGTAGCATTTCCCAAGAG            | 225                        |
| <i>Nobox</i>    | NM_130869       | CTATCCTGACAGTGACAAACGCC         | CACCCTCTCAGCACCTCATTAT          | 251                        |
| <i>Lhx8</i>     | NC_000069.5     | CAGTTCGCTCAGGACAACAA            | CCTGCAGTTCTGAAACCACA            | 105                        |
| <i>Sod1</i>     | NM_001005735.1  | GGGGAAGCATTAAGGACTGA            | CCACCGTGTTTTCTGGATAGA           | 124                        |
| <i>Glx2</i>     | XM_00652985     | ATCGTCGTTTTGGGGGAAGT            | GGAACAGTAAGAGCAGGATGTTT         | 152                        |
| <i>Sohlh2</i>   | NM_028937.3     | TCTCAGCCACATCACAGAGG            | GGGGACGCGAGTCTTATACA            | 199                        |
| <i>Gpx1</i>     | NM_000581.2     | AGTCGGTGTATGCCTTCTCG            | AGCTCGTTCATCTGGGTGTAGT          | 145                        |
| <i>α4 nAChR</i> | NM_015730       | CTCAGATGTGGTCCTTGTC             | GAGTTCAGATGGGATGCG              | 178                        |
| <i>α5 nAChR</i> | NM_176844       | CATCGTTTTGTTTGATAATGC           | TGCGTCCAAGTGACAGTG              | 90                         |
| <i>α7 nAChR</i> | NM_007390       | GGTCATTTGCCCACTCTG              | GACAGCCTATCGGGTGAG              | 130                        |
| <i>α9 nAChR</i> | NM_001081104    | ACAAGGCCACCAACTCCA              | ACCAACCCACTCCTCCTCTT            | 152                        |
| <i>α10nAChR</i> | NM_001081424    | TCTGACCTCACAACCCACAA            | TCCTGTCTCAGCCTCCATGT            | 168                        |
| <i>β4 nAChR</i> | NM_148944       | CTACAGGAAGCATTAGAGG             | CAGAATACACACAATCACG             | 146                        |

**Table S2. Antibodies used in this paper.**

| <b>Antibodies</b> | <b>Vendor</b>          | <b>Dilution</b> |
|-------------------|------------------------|-----------------|
| BCLIN-1 (WB)      | Cell signaling (#3738) | 1:1000          |
| LC3B (WB)         | Abcam (ab51520)        | 1:3000          |
| BCL-2 (WB)        | Beyotime (ab116)       | 1:1000          |
| mTOR (WB)         | Bioss (bs-1992R)       | 1:200           |
| AMPKα-1 (WB)      | Bioss(bs-1115R)        | 1:500           |
| MVH (IF/WB)       | Abcam(ab13840)         | 1:100           |
| AKT (WB)          | Cell signaling (#2920) | 1:1000          |
| NOBOX (IF/WB)     | Abcam ( ab41521)       | 1:150/1:1000    |
| LHX8 (WB)         | Abcam (ab126981)       | 1:1000          |
| β-ACTIN (WB)      | Abcam ( ab3280)        | 1:1000          |
| MT1               | Novusbio(Nbp1-71113)   | 1:500           |
